# Supplementary material for: Tumor Microenvironment-Responsive Polymeric iRGD and Doxorubicin Conjugates Reduce Spontaneous Lung Metastasis in an Orthotopic Breast Cancer Model
Source: MDPI journal article supplement (doi:10.3390/pharmaceutics14081725), 2022-08-18
Supplement: s1 [file s1]

## Supporting Information

### **Tumor Microenvironment-Responsive Polymeric iRGD and Doxorubicin Conjugates Reduce Spontaneous Lung Metastasis in an Orthotopic Breast Cancer Model**

**Zheng-Hong Peng <sup>1,2</sup>, Chinmay M. Jogdeo <sup>1</sup>, Jing Li <sup>1</sup>, Ying Xie <sup>1</sup>, Yazhe Wang <sup>1</sup>, Yuri M. Sheinin <sup>1,3</sup>, Jindřich Kopeček <sup>2,\*</sup> and David Oupický <sup>1,\*</sup>**

<sup>1</sup> Center for Drug Delivery and Nanomedicine, Department of Pharmaceutical Sciences, College of Pharmacy, University of Nebraska Medical Center, Omaha, NE 69198, USA;

<sup>2</sup> Department of Pharmaceutics and Pharmaceutical Chemistry/CCCD, Department of Biomedical Engineering, University of Utah, Salt Lake City, UT 84112, USA

<sup>3</sup> Department of Pathology, Medical College of Wisconsin, 9200 W. Wisconsin Avenue, Milwaukee, WI 53226, USA

\* Correspondence: jindrich.kopecek@utah.edu (J.K.); david.oupicky@unmc.edu (D.O.)

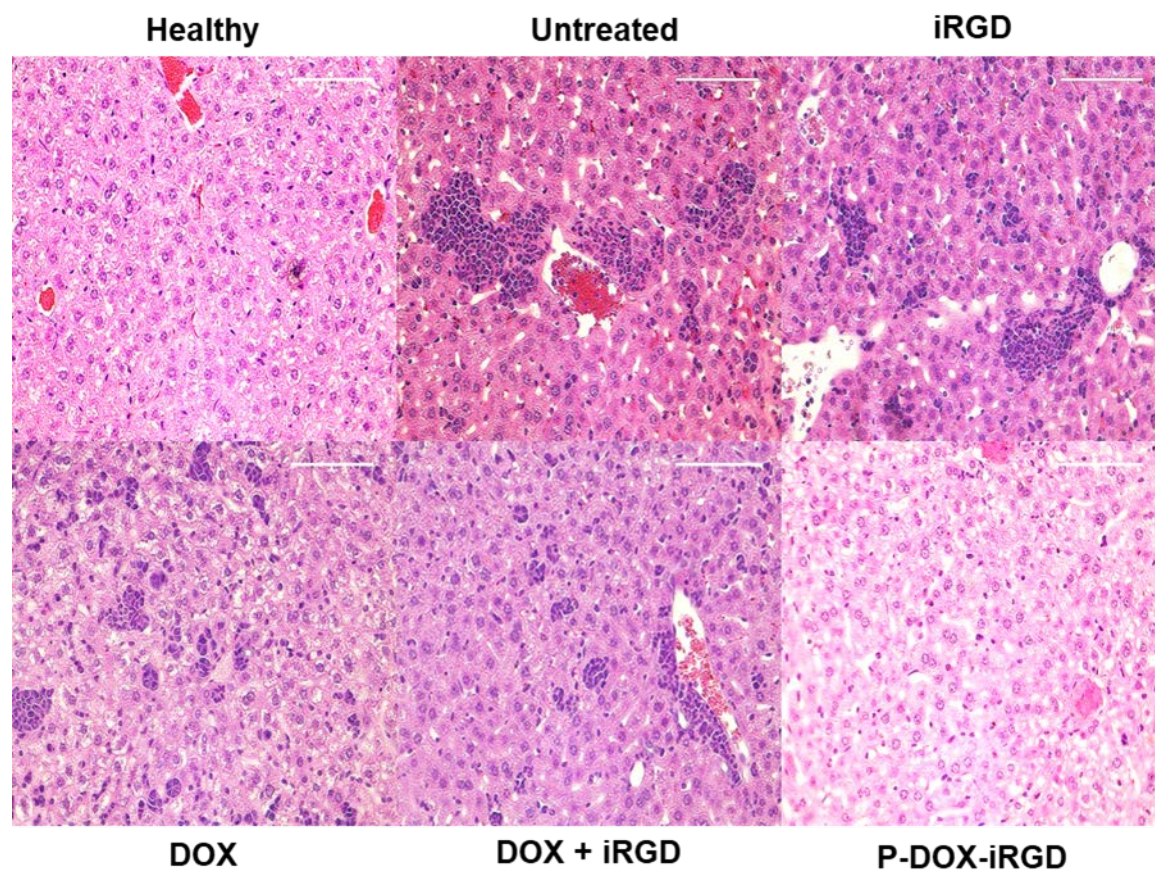

Figure S1. Hematoxylin and eosin stains (H&E) of liver. Scale bar = 100 µm

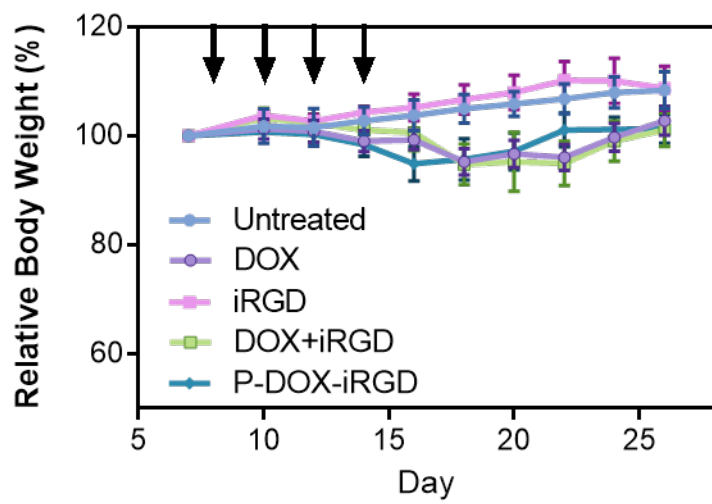

(A)

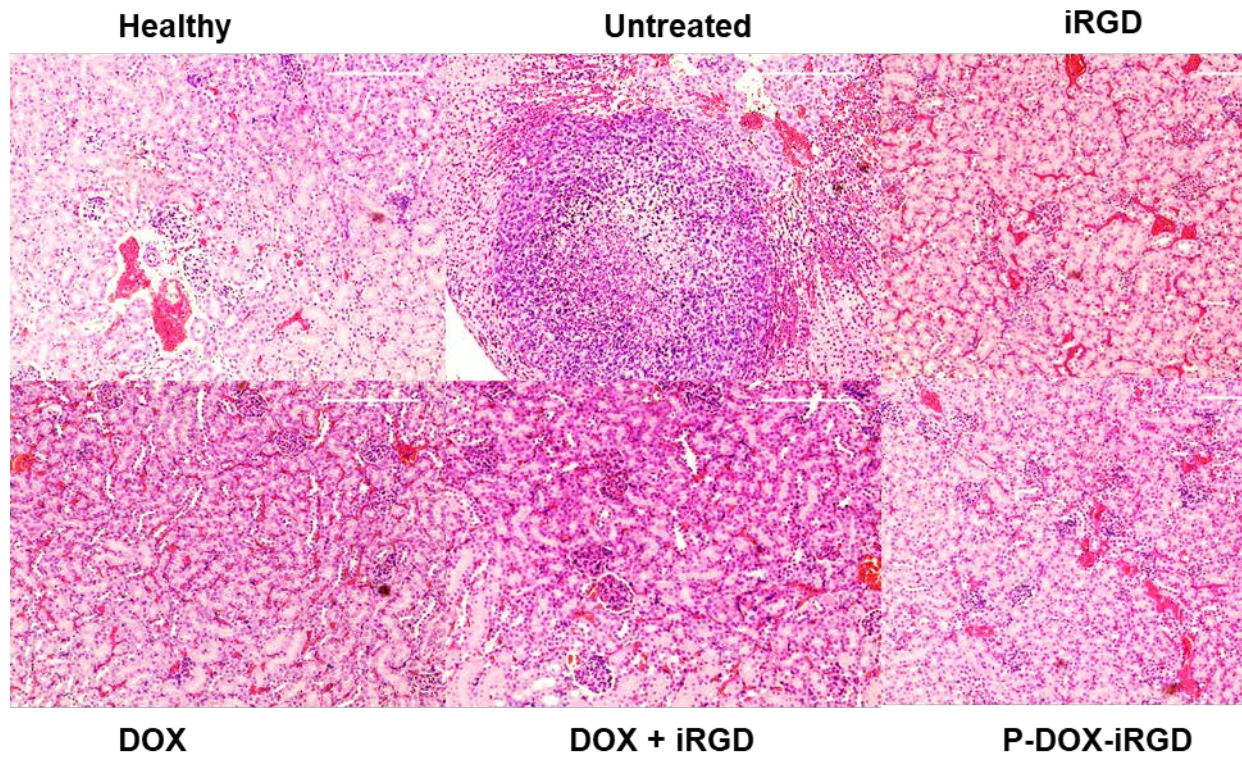

(B)



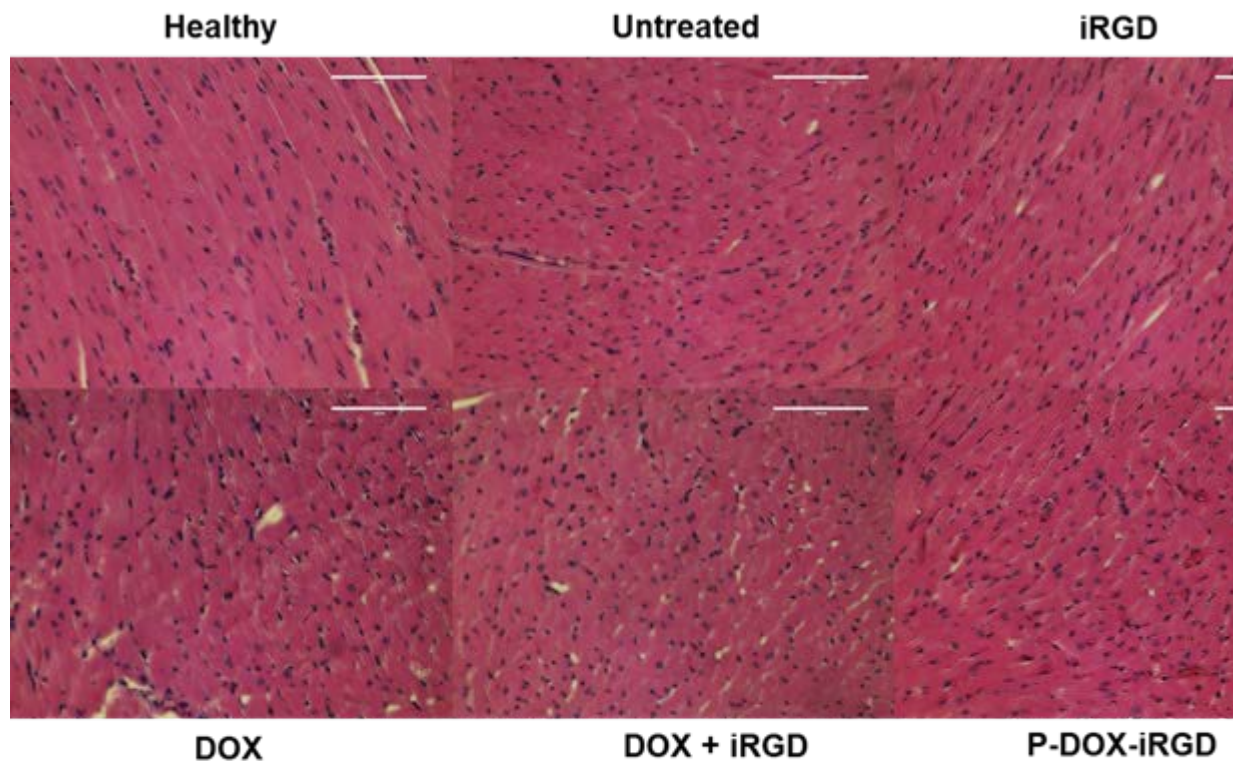

**Figure S2C.** Hematoxylin and eosin stains (H&E) of heart. Scale bar = 500  $\mu$ m

(C)

Figure S2. (A) Average body weight change (Mean  $\pm$  SD, n =8) of 4T1 tumor bearing mice. (B) Hematoxylin and eosin stains (H&E) of kidneys. Scale bar = 200  $\mu$ m. (C) Hematoxylin and eosin stains (H&E) of heart.
